# Supplementary material for: Biogeographical Patterns of Bacterial Communities and Their Antibiotic Resistomes in the Inland Waters of Southeast China
Source: PubMed Central journal article supplement (PMC9430403; doi:10.1128/spectrum.00406-22), 2022-06-23
Supplement: spectrum.00406-22-s0001.pdf [file spectrum.00406-22-s0001.pdf]

*Supplementary information of the article:*

## **Biogeographical patterns of bacterial communities and their antibiotic resistomes in the inland waters of southeast China**

Peiju Fang<sup>a,b,c,d</sup>, Peng Xiao<sup>a</sup>, Fengjiao Tan<sup>a,b</sup>, Yuanyuan Mo<sup>a,b</sup>, Huihuang Chen<sup>a,b,d</sup>, Uli Klümper<sup>c</sup>, Thomas U. Berendonk<sup>c</sup>, Jun Yang<sup>a,d,\*</sup>

<sup>a</sup> *Aquatic Ecohealth Group, Fujian Key Laboratory of Watershed Ecology, Ningbo Observation and Research Station, Key Laboratory of Urban Environment and Health, Institute of Urban Environment, Chinese Academy of Sciences, Xiamen 361021, China*

<sup>b</sup> *University of Chinese Academy of Sciences, Beijing 100049, China*

<sup>c</sup> *Institute of Hydrobiology, Technical University of Dresden, Dresden 01217, Germany*

<sup>d</sup> *Zhejiang Key Laboratory of Urban Environmental Processes and Pollution Control, CAS Haixi Industrial Technology Innovation Center in Beilun, Ningbo 315830, China*

### **\*Corresponding author:**

E-mail: [jyang@iue.ac.cn](mailto:jyang@iue.ac.cn) (Jun Yang)

### **This supplementary information contains:**

- 15 Pages
- 8 Figures
- 6 Tables

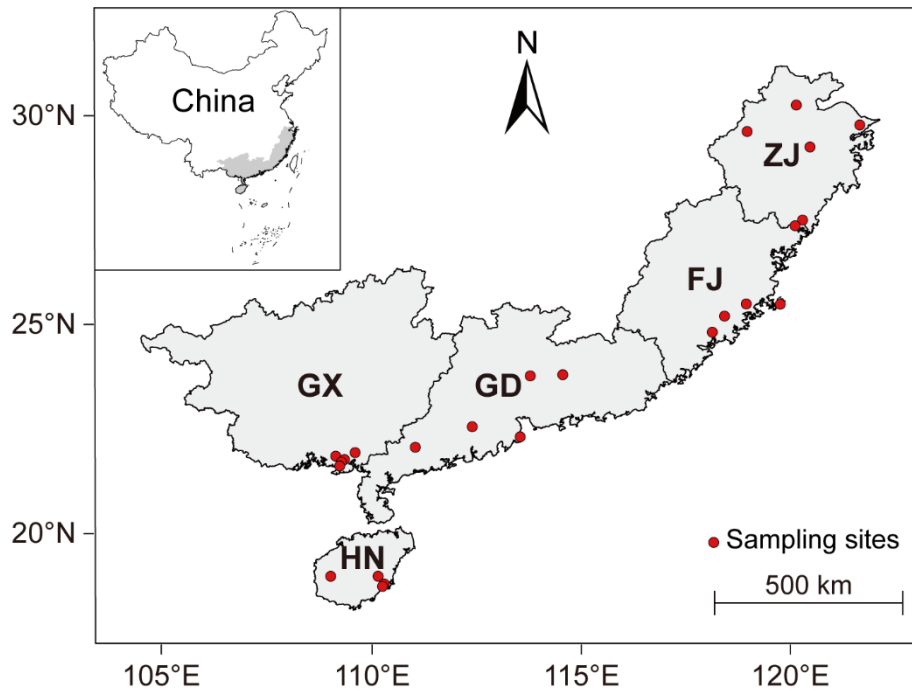

**Fig. S1.** Location of 24 sampling reservoirs in five provinces of southeast China. ZJ: Zhejiang province; FJ: Fujian province; GD: Guangdong province; GX: Guangxi province; HN: Hainan province.

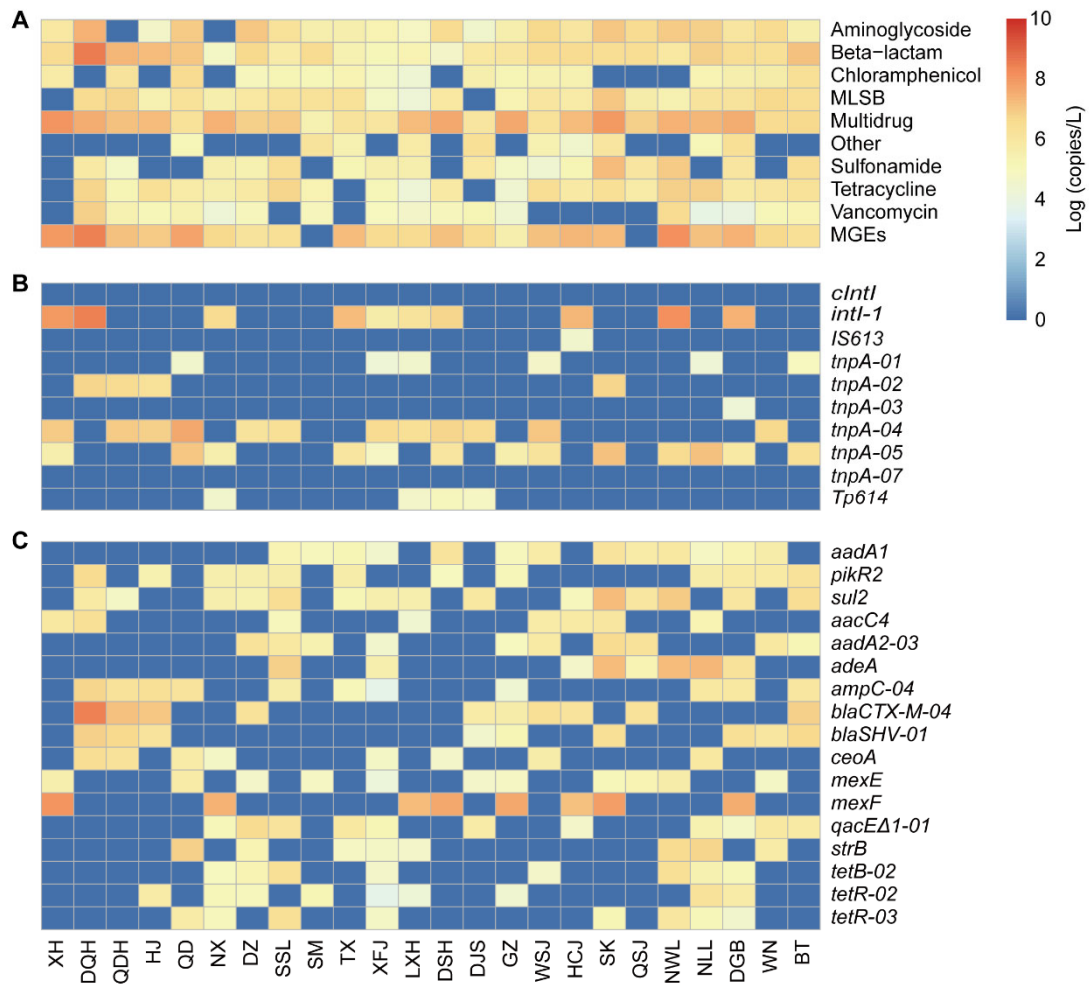

**Fig. S2.** Absolute abundance of antibiotic resistance genes (ARGs) and mobile genetic elements (MGEs) in 24 reservoirs. Profiling of **(A)** ARGs and MGEs, **(B)** detected MGEs and **(C)** core ARGs based on the absolute abundance [ $\log(\text{copies/L})$ ], ranging from low (blue) to high (red) values. MLSB, macrolide-lincosamide-streptogramin B. For detailed abbreviation information of each reservoir see Table S1.

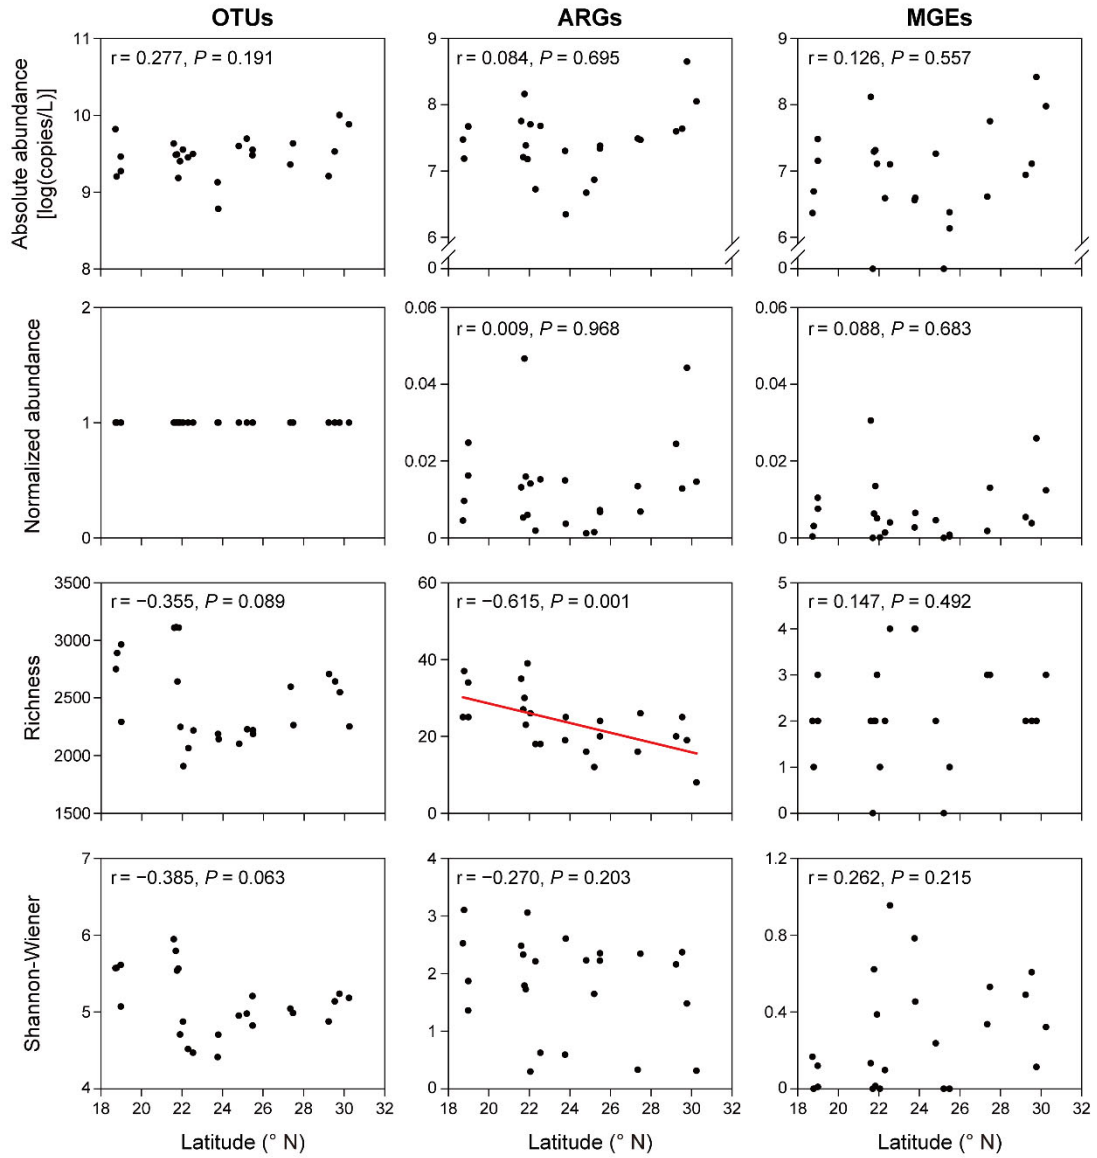

**Fig. S3.** The abundance, richness and diversity of bacterial communities, antibiotic resistance genes (ARGs) and mobile genetic elements (MGEs) profiles change along latitude gradient. Only significant Spearman's correlation is showed with fitted line.

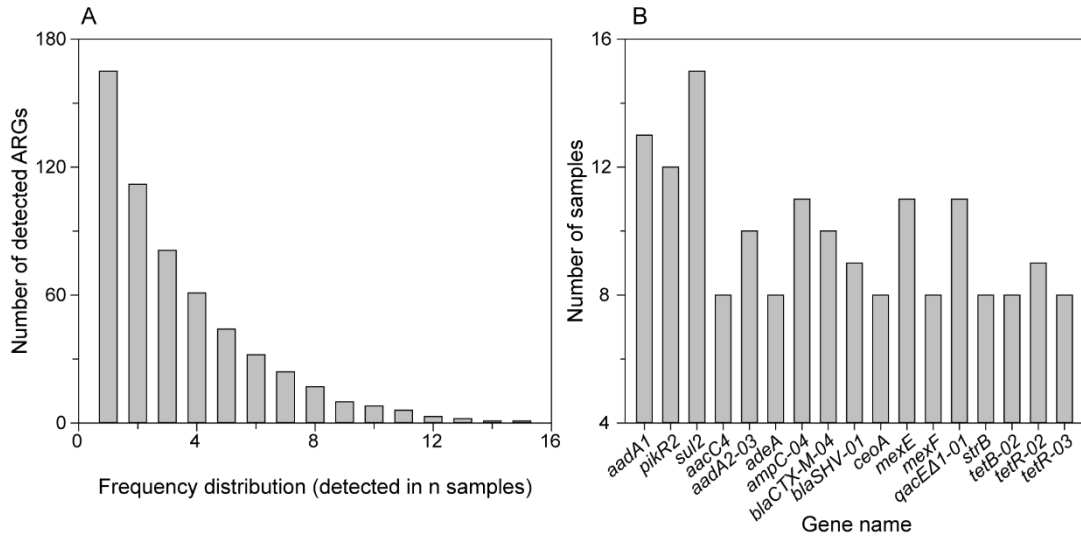

**Fig. S4.** ARGs in reservoir waters of southeast China. **(A)** Frequency distribution of ARGs in reservoirs. **(B)** Number of samples in which ARGs can be detected, only prevalent ARGs (core and common ARGs) are shown.

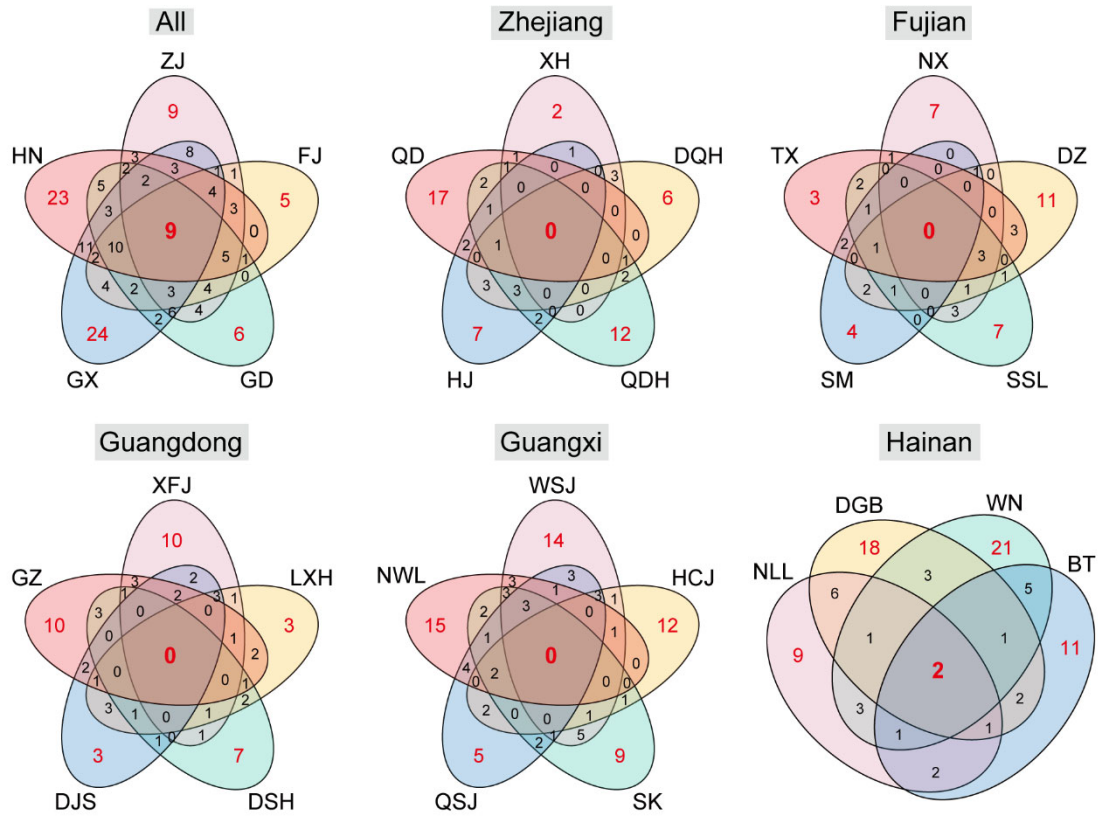

**Fig. S5.** The number of shared and unique ARGs among different reservoirs. All: all five provinces including Zhejiang, Fujian, Guangdong, Guangxi, and Hainan provinces. For detailed abbreviation information of each reservoir see Table S1.

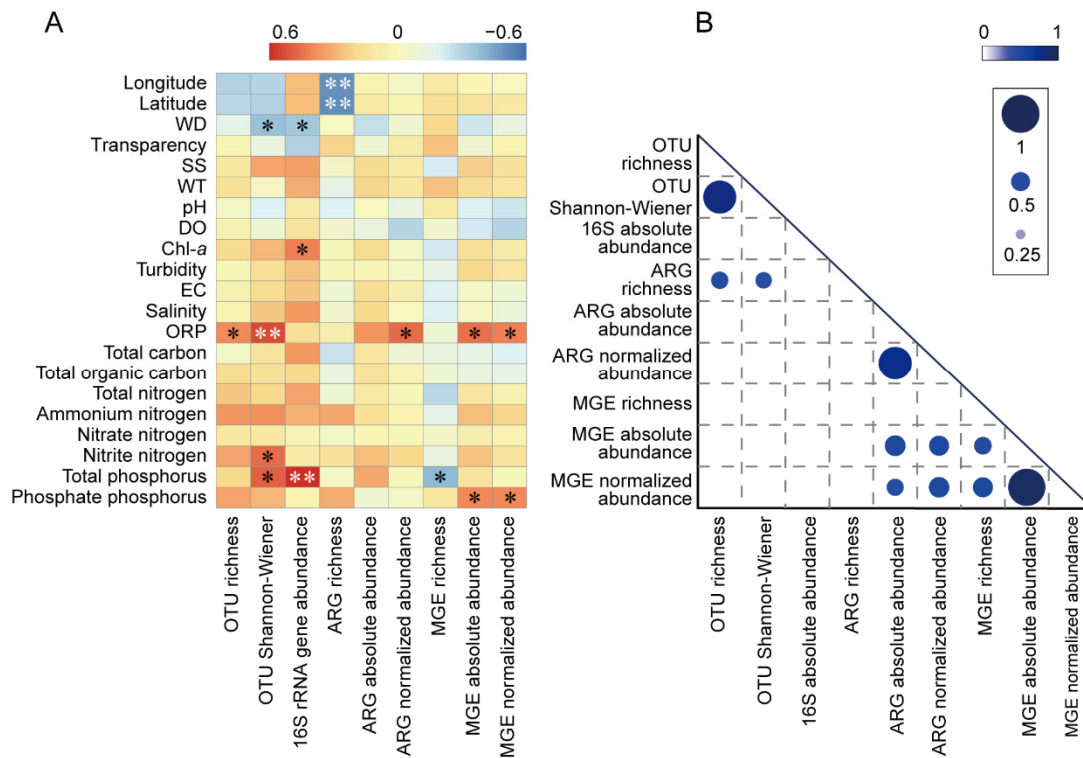

**Fig. S6.** Spearman's correlation between diversity and abundance of bacterial communities, ARGs, MGEs and geographical or environmental factors. **(A)** Spearman's correlation between environmental factors and bacterial communities, ARGs, and MGEs. \*  $P < 0.05$ , \*\*  $P < 0.01$ . **(B)** Spearman's correlation between bacterial OTUs, ARGs and MGEs. 16S represents 16S rRNA gene. Note that only significant relationships are showed in the diagram. WD, water depth; SS, suspended solid; WT, water temperature; DO, dissolved oxygen; EC, electrical conductivity; ORP, oxidation-reduction potential.

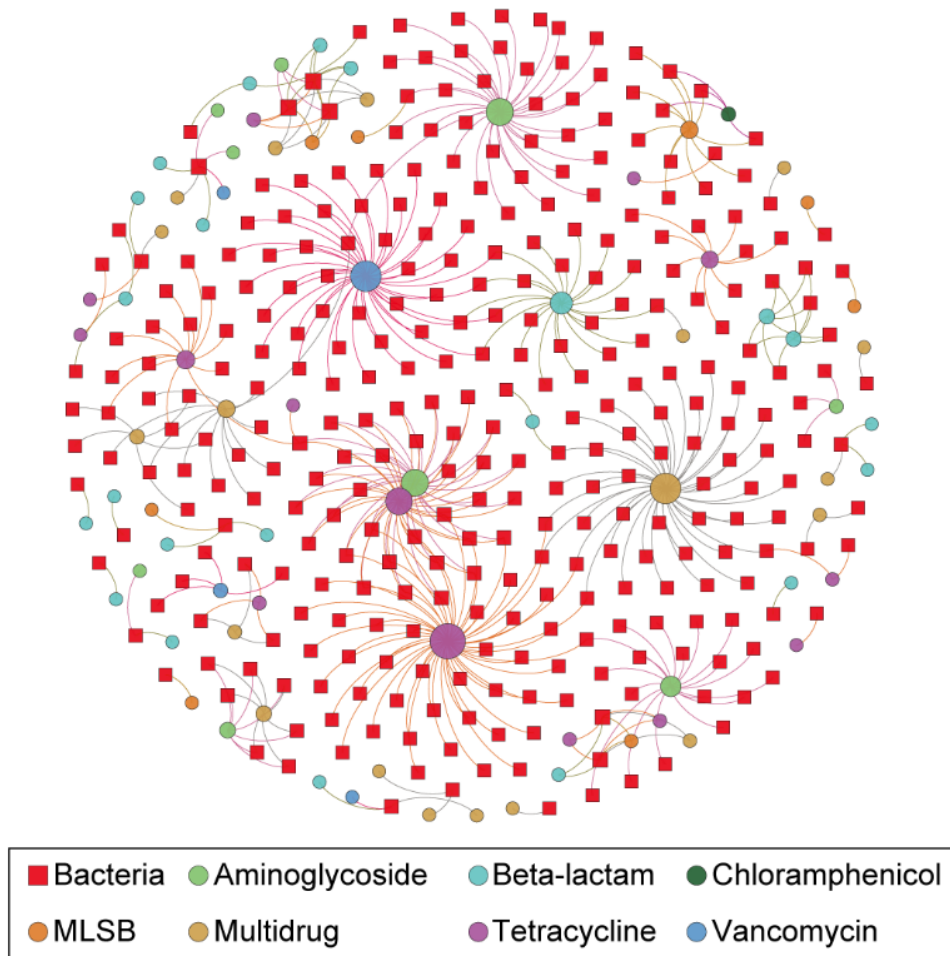

**Fig. S7.** Network analysis showing significant correlations between bacterial OTUs and ARGs. The size of node corresponds to the number of connections, and the color of the node was assigned according to different ARG classes.



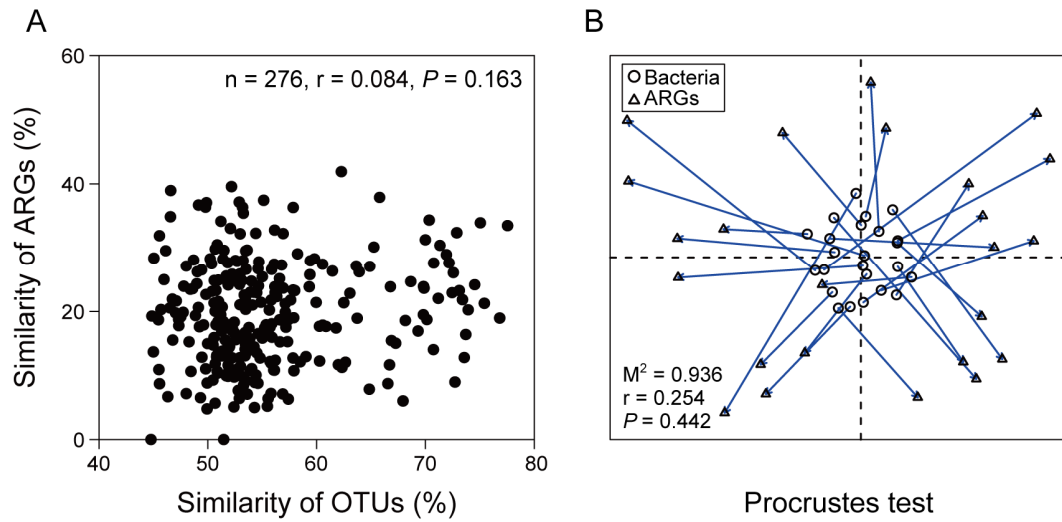

**Fig. S8.** Relationship between bacterial communities and ARG profiles. **(A)** Spearman’s correlation between the Bray-Curtis similarity of bacterial communities and ARG profiles. **(B)** Procrustes test showing the correlation between ARG profiles and bacterial communities based on Bray-Curtis similarity metrics ( $M^2 = 0.936$ ,  $r = 0.254$ ,  $P = 0.442$ , 999 permutation).

**Table S1.** Information of 24 sampling reservoirs in this study.

| Reservoir name  | Sample ID | Region | Lat. (°N) | Long. (°E) | Province  |
|-----------------|-----------|--------|-----------|------------|-----------|
| Xihu            | XH        | ZJ     | 30.2391   | 120.1426   | Zhejiang  |
| Dongqianhu      | DQH       | ZJ     | 29.7679   | 121.6629   | Zhejiang  |
| Xin'anjiang     | QDH       | ZJ     | 29.5359   | 118.9782   | Zhejiang  |
| Henjin          | HJ        | ZJ     | 29.2352   | 120.4731   | Zhejiang  |
| Qiaodun         | QD        | ZJ     | 27.4754   | 120.3054   | Zhejiang  |
| Nanxi           | NX        | FJ     | 27.3428   | 120.1222   | Fujian    |
| Dongzhen        | DZ        | FJ     | 25.4843   | 118.9453   | Fujian    |
| Sanshiliujiaohu | SSL       | FJ     | 25.4786   | 119.7636   | Fujian    |
| Shanmei         | SM        | FJ     | 25.1960   | 118.4288   | Fujian    |
| Tingxi          | TX        | FJ     | 24.8033   | 118.1394   | Fujian    |
| Xinfengjiang    | XFJ       | GD     | 23.7923   | 114.5865   | Guangdong |
| Liuxihe         | LXH       | GD     | 23.7575   | 113.7882   | Guangdong |
| Dashahe         | DSH       | GD     | 22.5447   | 112.3987   | Guangdong |
| Dajingshan      | DJS       | GD     | 22.2977   | 113.5488   | Guangdong |
| Gaozhou         | GZ        | GD     | 22.0502   | 111.0419   | Guangdong |
| Wangshengjiang  | WSJ       | GX     | 21.9051   | 109.6093   | Guangxi   |
| Hongchaojiang   | H CJ      | GX     | 21.8219   | 109.1519   | Guangxi   |
| Shikang         | SK        | GX     | 21.7591   | 109.3507   | Guangxi   |
| Qingshuijiang   | QSJ       | GX     | 21.6964   | 109.2698   | Guangxi   |
| Niuweiling      | NWL       | GX     | 21.5973   | 109.2382   | Guangxi   |
| Niululing       | NLL       | HN     | 18.9863   | 110.1488   | Hainan    |
| Daguangba       | DGB       | HN     | 18.9802   | 109.0062   | Hainan    |
| Wanning         | WN        | HN     | 18.7822   | 110.3127   | Hainan    |
| Beitou          | BT        | HN     | 18.7233   | 110.2690   | Hainan    |

ZJ: Zhejiang province; FJ: Fujian province; GD: Guangdong province; GX: Guangxi province; HN: Hainan province.

**Table S2.** The total absolute and normalized abundance of bacteria, ARG and MGE in each reservoir.

| Reservoir       | 16S rRNA gene<br>abundance<br>(copies/L) | ARG<br>absolute<br>abundance<br>(copies/L) | ARG<br>normalized<br>abundance | MGE<br>absolute<br>abundance<br>(copies/L) | MGE<br>normalized<br>abundance |
|-----------------|------------------------------------------|--------------------------------------------|--------------------------------|--------------------------------------------|--------------------------------|
| Xihu            | 7.65E+09                                 | 1.12E+08                                   | 1.46E-02                       | 9.47E+07                                   | 1.24E-02                       |
| Dongqianhu      | 1.01E+10                                 | 4.47E+08                                   | 4.43E-02                       | 2.61E+08                                   | 2.59E-02                       |
| Xin'anjiang     | 3.38E+09                                 | 4.34E+07                                   | 1.28E-02                       | 1.28E+07                                   | 3.80E-03                       |
| Henjin          | 1.62E+09                                 | 3.96E+07                                   | 2.45E-02                       | 8.73E+06                                   | 5.40E-03                       |
| Qiaodun         | 4.31E+09                                 | 2.95E+07                                   | 6.84E-03                       | 5.62E+07                                   | 1.30E-02                       |
| Nanxi           | 2.29E+09                                 | 3.08E+07                                   | 1.34E-02                       | 4.10E+06                                   | 1.79E-03                       |
| Dongzhen        | 3.56E+09                                 | 2.40E+07                                   | 6.75E-03                       | 1.36E+06                                   | 3.82E-04                       |
| Sanshiliujiaohu | 3.02E+09                                 | 2.18E+07                                   | 7.21E-03                       | 2.38E+06                                   | 7.88E-04                       |
| Shanmei         | 4.97E+09                                 | 7.38E+06                                   | 1.48E-03                       | 0.00E+00                                   | 0.00E+00                       |
| Tingxi          | 3.98E+09                                 | 4.71E+06                                   | 1.18E-03                       | 1.82E+07                                   | 4.58E-03                       |
| Xinfengjiang    | 6.07E+08                                 | 2.22E+06                                   | 3.66E-03                       | 3.94E+06                                   | 6.49E-03                       |
| Liuxihe         | 1.34E+09                                 | 2.01E+07                                   | 1.49E-02                       | 3.63E+06                                   | 2.70E-03                       |
| Dashahe         | 3.15E+09                                 | 4.79E+07                                   | 1.52E-02                       | 1.26E+07                                   | 4.01E-03                       |
| Dajingshan      | 2.84E+09                                 | 5.31E+06                                   | 1.87E-03                       | 3.88E+06                                   | 1.37E-03                       |
| Gaozhou         | 3.58E+09                                 | 5.06E+07                                   | 1.41E-02                       | 3.56E+05                                   | 9.93E-05                       |
| Wangshengjiang  | 2.53E+09                                 | 1.51E+07                                   | 5.96E-03                       | 1.28E+07                                   | 5.07E-03                       |
| Hongchaojiang   | 1.53E+09                                 | 2.43E+07                                   | 1.59E-02                       | 2.06E+07                                   | 1.35E-02                       |
| Shikang         | 3.10E+09                                 | 1.45E+08                                   | 4.67E-02                       | 1.96E+07                                   | 6.31E-03                       |
| Qingshuijiang   | 3.06E+09                                 | 1.62E+07                                   | 5.29E-03                       | 0.00E+00                                   | 0.00E+00                       |
| Niuweiling      | 4.30E+09                                 | 5.65E+07                                   | 1.31E-02                       | 1.31E+08                                   | 3.05E-02                       |
| Niululing       | 1.88E+09                                 | 4.65E+07                                   | 2.48E-02                       | 1.42E+07                                   | 7.56E-03                       |
| Daguangba       | 2.90E+09                                 | 4.71E+07                                   | 1.62E-02                       | 3.02E+07                                   | 1.04E-02                       |
| Wanning         | 1.60E+09                                 | 1.54E+07                                   | 9.60E-03                       | 4.91E+06                                   | 3.07E-03                       |
| Beitou          | 6.61E+09                                 | 2.97E+07                                   | 4.49E-03                       | 2.32E+06                                   | 3.51E-04                       |
| Mean ± SE       | 3.50E+09 ±<br>4.36E+08                   | 5.34E+07 ±<br>1.84E+07                     | 1.35E-02 ±<br>2.41E-03         | 3.00E+07 ±<br>1.20E+07                     | 6.65E-03 ±<br>1.61E-03         |

Note that the normalized abundance is the ratio of ARGs and MGEs to 16S rRNA gene.

**Table S3.** Spearman's correlation between bacterial taxonomy and resistant function at phylum and ARG class levels, respectively.

|                 | Aminoglycoside | Beta-lactam   | Chloramphenicol | MLSB          | Multidrug | Others | Sulfonamide | Tetracycline  | Vancomycin | MGEs   |
|-----------------|----------------|---------------|-----------------|---------------|-----------|--------|-------------|---------------|------------|--------|
| Acidobacteria   | 0.011          | 0.050         | 0.037           | -0.090        | 0.035     | -0.003 | 0.015       | -0.056        | -0.021     | -0.010 |
| Actinobacteria  | 0.088          | 0.047         | 0.066           | <b>0.149*</b> | 0.036     | 0.016  | -0.003      | 0.099         | -0.020     | 0.111  |
| Bacteroidetes   | 0.151          | -0.053        | 0.097           | -0.029        | -0.030    | -0.090 | -0.138      | 0.013         | -0.183     | 0.015  |
| Chloroflexi     | <b>0.201*</b>  | 0.023         | -0.010          | -0.115        | -0.101    | -0.193 | -0.084      | 0.095         | -0.225     | 0.138  |
| Cyanobacteria   | -0.007         | <b>0.166*</b> | 0.040           | -0.089        | -0.006    | -0.163 | -0.202      | <b>0.150*</b> | -0.113     | 0.018  |
| Firmicutes      | -0.112         | -0.052        | 0.048           | 0.145         | 0.034     | 0.053  | -0.068      | 0.115         | -0.086     | 0.086  |
| Patescibacteria | 0.133          | -0.007        | 0.139           | 0.009         | 0.010     | 0.127  | 0.012       | <b>0.150*</b> | 0.061      | -0.040 |
| Planctomycetes  | 0.149          | 0.014         | 0.087           | 0.010         | -0.078    | -0.233 | -0.083      | 0.087         | -0.120     | -0.027 |
| Proteobacteria  | 0.078          | 0.003         | <b>0.154*</b>   | 0.090         | 0.029     | -0.133 | -0.078      | 0.078         | -0.012     | 0.069  |
| Verrucomicrobia | 0.079          | 0.074         | -0.029          | -0.214        | -0.084    | -0.288 | -0.072      | -0.107        | -0.084     | 0.013  |

MLSB, macrolide-lincosamide-streptogramin B.

Significant correlations ( $P < 0.05$ ) are shown in bold.

\*  $P < 0.05$ ; \*\*  $P < 0.01$

**Table S4.** Spearman's correlation between ARG classes and eight MGE marker genes based on absolute abundance.

|                | Aminoglycoside | Beta-lactam     | Chloramphenicol | MLSB           | Multidrug     | Others | Sulfonamide     | Tetracycline | Vancomycin |
|----------------|----------------|-----------------|-----------------|----------------|---------------|--------|-----------------|--------------|------------|
| <i>intI-1</i>  | 0.077          | -0.224          | -0.218          | -0.250         | <b>0.427*</b> | -0.049 | 0.151           | -0.090       | -0.030     |
| <i>IS613</i>   | -0.015         | 0.136           | 0.137           | -0.075         | 0.015         | 0.084  | -0.046          | -0.015       | -0.259     |
| <i>tnpA-01</i> | -0.006         | 0.129           | 0.304           | -0.004         | -0.328        | 0.163  | -0.063          | 0.085        | 0.069      |
| <i>tnpA-02</i> | 0.095          | <b>0.495*</b>   | -0.272          | <b>0.431*</b>  | 0.339         | -0.107 | 0.102           | 0.253        | 0.263      |
| <i>tnpA-03</i> | 0.015          | 0.015           | 0.198           | 0.075          | 0.196         | 0.387  | 0.198           | 0.015        | -0.107     |
| <i>tnpA-04</i> | -0.145         | 0.105           | 0.343           | -0.085         | -0.211        | -0.129 | <b>-0.520**</b> | -0.123       | 0.185      |
| <i>tnpA-05</i> | 0.347          | -0.020          | 0.129           | 0.159          | 0.237         | 0.198  | 0.038           | 0.246        | -0.134     |
| <i>Tp614</i>   | -0.366         | <b>-0.578**</b> | -0.253          | <b>-0.421*</b> | 0.078         | 0.146  | 0.026           | -0.329       | 0.094      |

The data used were **absolute** abundance (copy number per litre water).

Further information regarding the PCR primers can be found in Guo et al. 2018 (ref. 10).

MLSB, macrolide-lincosamide-streptogramin B.

\*  $P < 0.05$ , \*\*  $P < 0.01$ .

**Table S5.** Spearman's correlation between ARG classes and eight MGE marker genes based on normalized abundance.

|                | Aminoglycoside | Beta-lactam     | Chloramphenicol | MLSB           | Multidrug | Others | Sulfonamide | Tetracycline | Vancomycin |
|----------------|----------------|-----------------|-----------------|----------------|-----------|--------|-------------|--------------|------------|
| <i>intI-1</i>  | 0.051          | -0.284          | -0.276          | -0.323         | 0.314     | -0.057 | 0.162       | -0.068       | 0.044      |
| <i>IS613</i>   | 0.045          | 0.196           | 0.229           | 0.015          | 0.075     | 0.084  | 0.046       | 0.106        | -0.259     |
| <i>tnpA-01</i> | 0.037          | 0.098           | 0.341           | -0.015         | -0.135    | 0.218  | 0.035       | 0.138        | 0.129      |
| <i>tnpA-02</i> | 0.012          | <b>0.491*</b>   | -0.231          | 0.306          | 0.260     | -0.086 | 0.012       | 0.185        | 0.221      |
| <i>tnpA-03</i> | -0.015         | 0.045           | 0.168           | 0.196          | 0.136     | 0.387  | 0.198       | 0.015        | -0.137     |
| <i>tnpA-04</i> | -0.105         | 0.096           | 0.311           | -0.055         | -0.191    | -0.097 | -0.354      | -0.012       | 0.350      |
| <i>tnpA-05</i> | 0.362          | -0.080          | 0.069           | 0.243          | 0.149     | 0.209  | 0.062       | 0.229        | -0.153     |
| <i>Tp614</i>   | -0.365         | <b>-0.567**</b> | -0.283          | <b>-0.419*</b> | 0.227     | 0.179  | 0.009       | -0.346       | 0.120      |

The data used were **normalized** abundance (ARGs and MGEs absolute abundance/16S rRNA gene absolute abundance).

Further information regarding the PCR primers can be found in Guo et al. 2018 ([ref. 10](#)).

MLSB, macrolide-lincosamide-streptogramin B.

\*  $P < 0.05$ , \*\*  $P < 0.01$ .

**Table S6.** The co-occurrence patterns between ARGs and MGE marker genes.

| MGEs           | Co-occurring ARGs         | Co-occurring ARGs class | Spearman's correlation coefficient |
|----------------|---------------------------|-------------------------|------------------------------------|
| <i>IS613</i>   | <i>aadA2-02</i>           | Aminoglycoside          | 0.72                               |
|                | <i>aadA5-02</i>           | Aminoglycoside          | 1.00                               |
|                | <i>blaPAO</i>             | Beta-lactam             | 0.60                               |
|                | <i>oprD</i>               | Beta-lactam             | 0.66                               |
|                | <i>erm(36)</i>            | MLSB                    | 0.66                               |
|                | <i>oprJ</i>               | Multidrug               | 0.66                               |
|                | <i>putitive multidrug</i> | Multidrug               | 1.00                               |
|                | <i>nimE</i>               | Others                  | 0.66                               |
|                | <i>tet(34)</i>            | Tetracycline            | 0.60                               |
| <i>tnpA-01</i> | <i>blaCTX-M-01</i>        | Beta-lactam             | 0.67                               |
| <i>tnpA-02</i> | <i>blaSHV-01</i>          | Beta-lactam             | 0.68                               |
|                | <i>tetE</i>               | Tetracycline            | 0.64                               |
|                | <i>tetL-02</i>            | Tetracycline            | 0.70                               |
| <i>tnpA-03</i> | <i>aacA/aphD</i>          | Aminoglycoside          | 0.66                               |
|                | <i>aacC1</i>              | Aminoglycoside          | 0.66                               |
|                | <i>aadA9-01</i>           | Aminoglycoside          | 1.00                               |
|                | <i>aadD</i>               | Aminoglycoside          | 0.72                               |
|                | <i>spcN-01</i>            | Aminoglycoside          | 1.00                               |
|                | <i>ampC-06</i>            | Beta-lactam             | 0.72                               |
|                | <i>blaCMY2-01</i>         | Beta-lactam             | 1.00                               |
|                | <i>imiR</i>               | Beta-lactam             | 1.00                               |
|                | <i>pikR1</i>              | MLSB                    | 0.66                               |
|                | <i>mtrC-01</i>            | Multidrug               | 0.66                               |
|                | <i>qacA/qacB</i>          | Multidrug               | 1.00                               |
|                | <i>sul1</i>               | Sulfonamide             | 0.72                               |
|                | <i>vanSE</i>              | Vancomycin              | 1.00                               |
| <i>tnpA-04</i> | <i>acrR-01</i>            | Multidrug               | 0.60                               |
| <i>tnpA-05</i> | <i>aacC</i>               | Aminoglycoside          | 0.74                               |
| <i>Tp614</i>   | <i>vanC2/vanC3</i>        | Vancomycin              | 0.71                               |

Further information regarding the PCR primers can be found in Guo et al. 2018 (ref. 10).

MLSB, macrolide-lincosamide-streptogramin B.

Only connections with a strong (Spearman's correlation coefficient  $r \geq 0.6$ ) and significant ( $P < 0.01$ ) correlation are presented.
